# Supplementary material
Source: PubMed Central journal article supplement (PMC5159550)
Supplement: supp_gkw869_nar-02414-z-2016-File010.pdf [file supp_gkw869_nar-02414-z-2016-File010.pdf]

a) BER Reaction Scheme

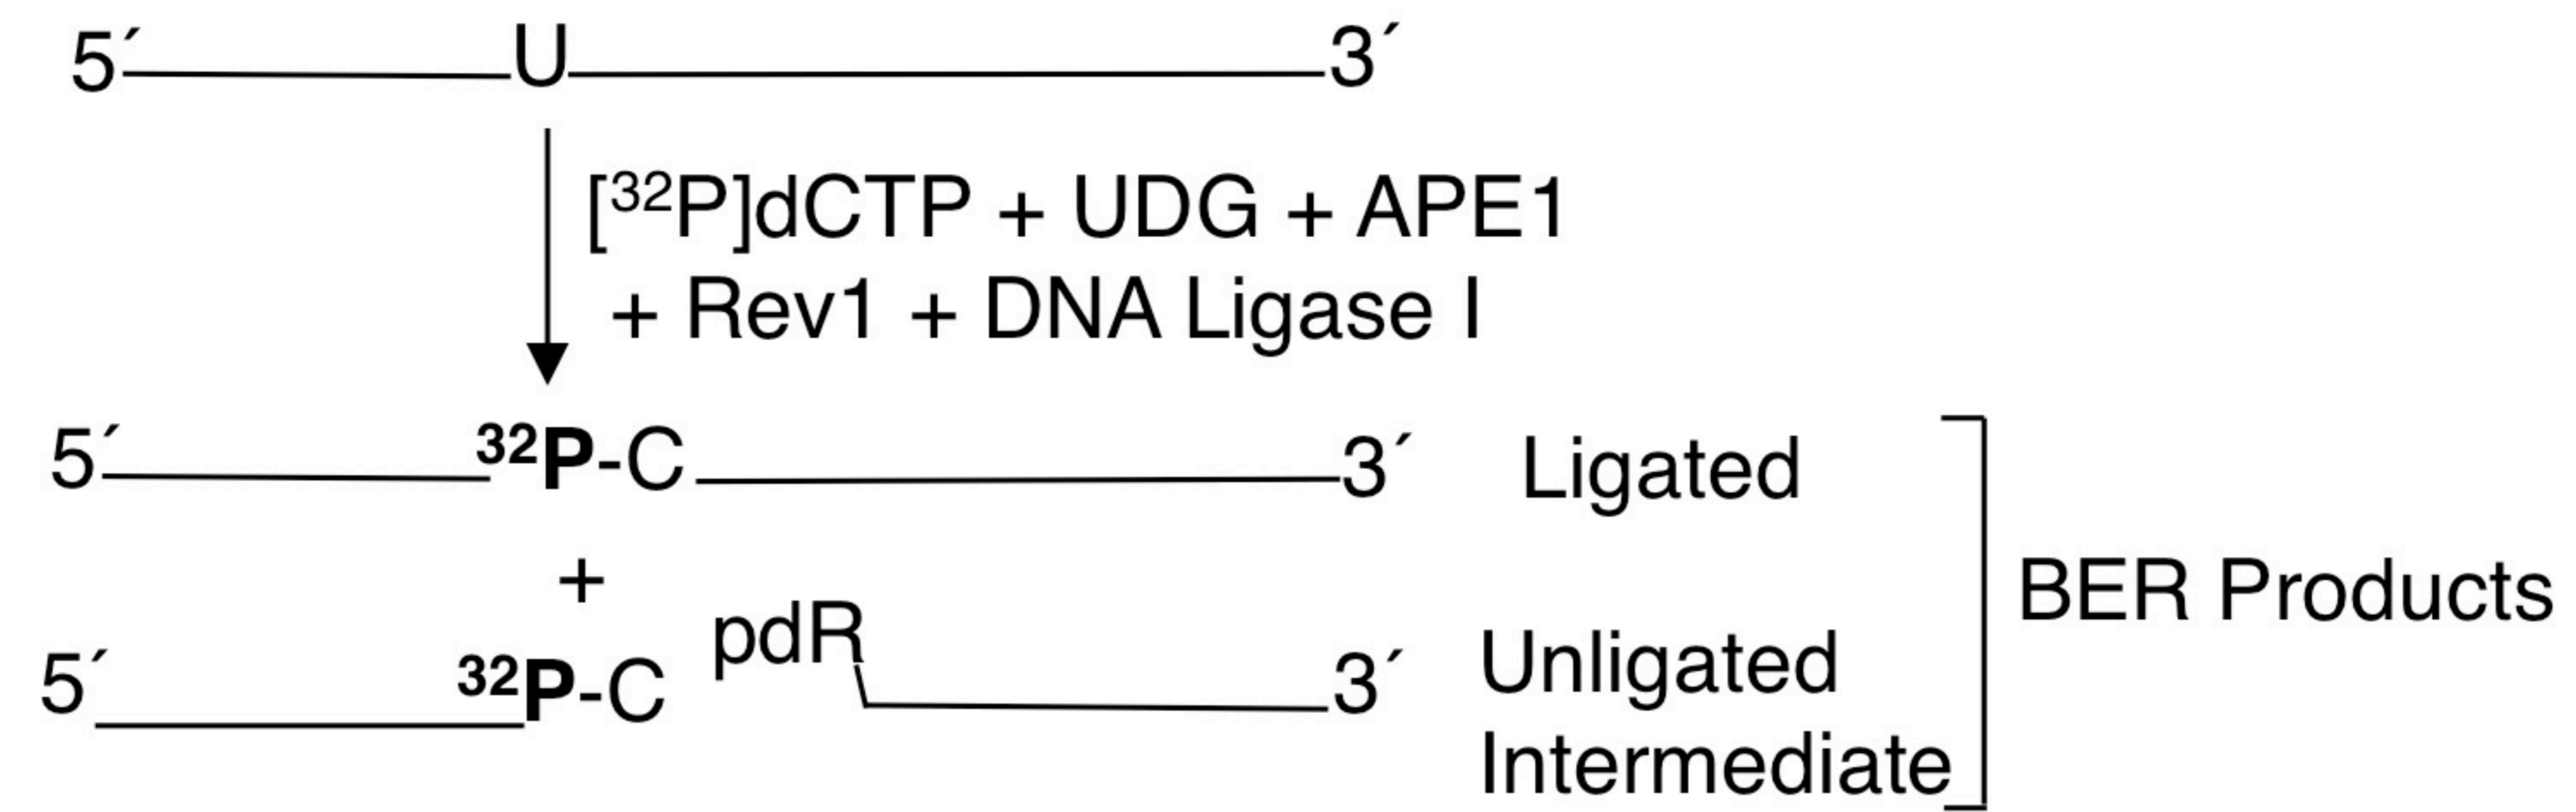

b) MBP-Full-length Rev1

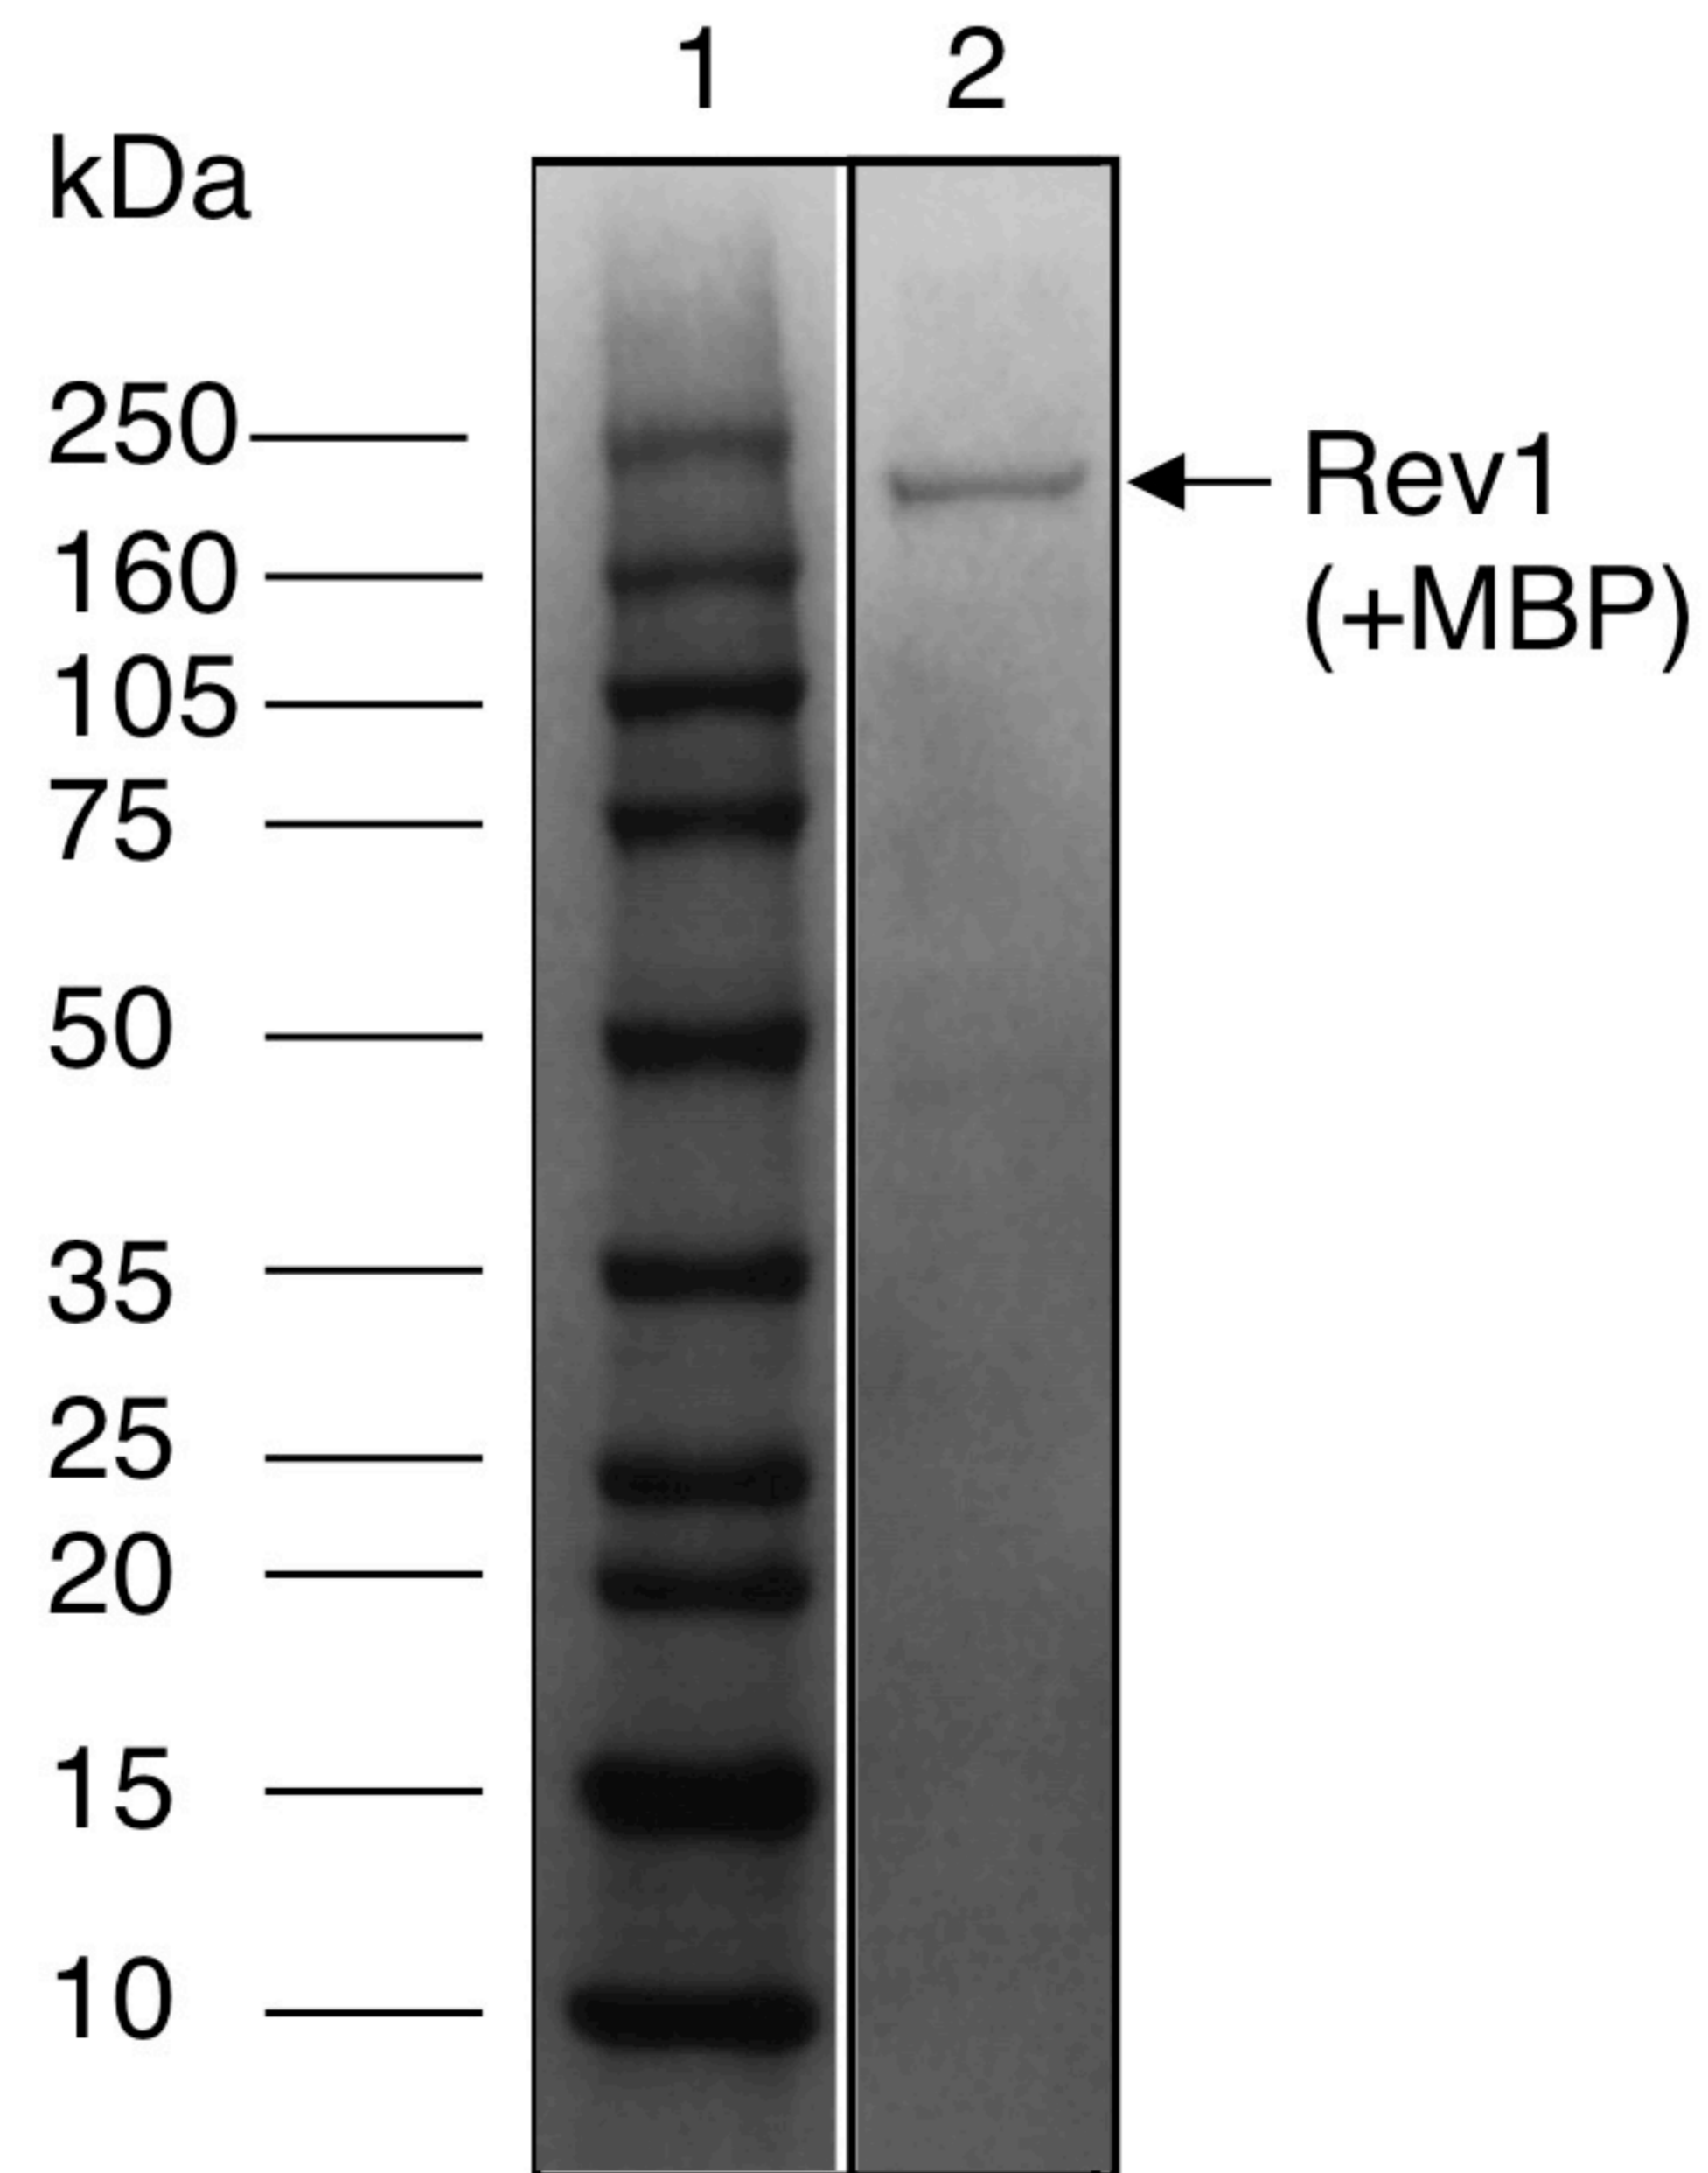

c) BER

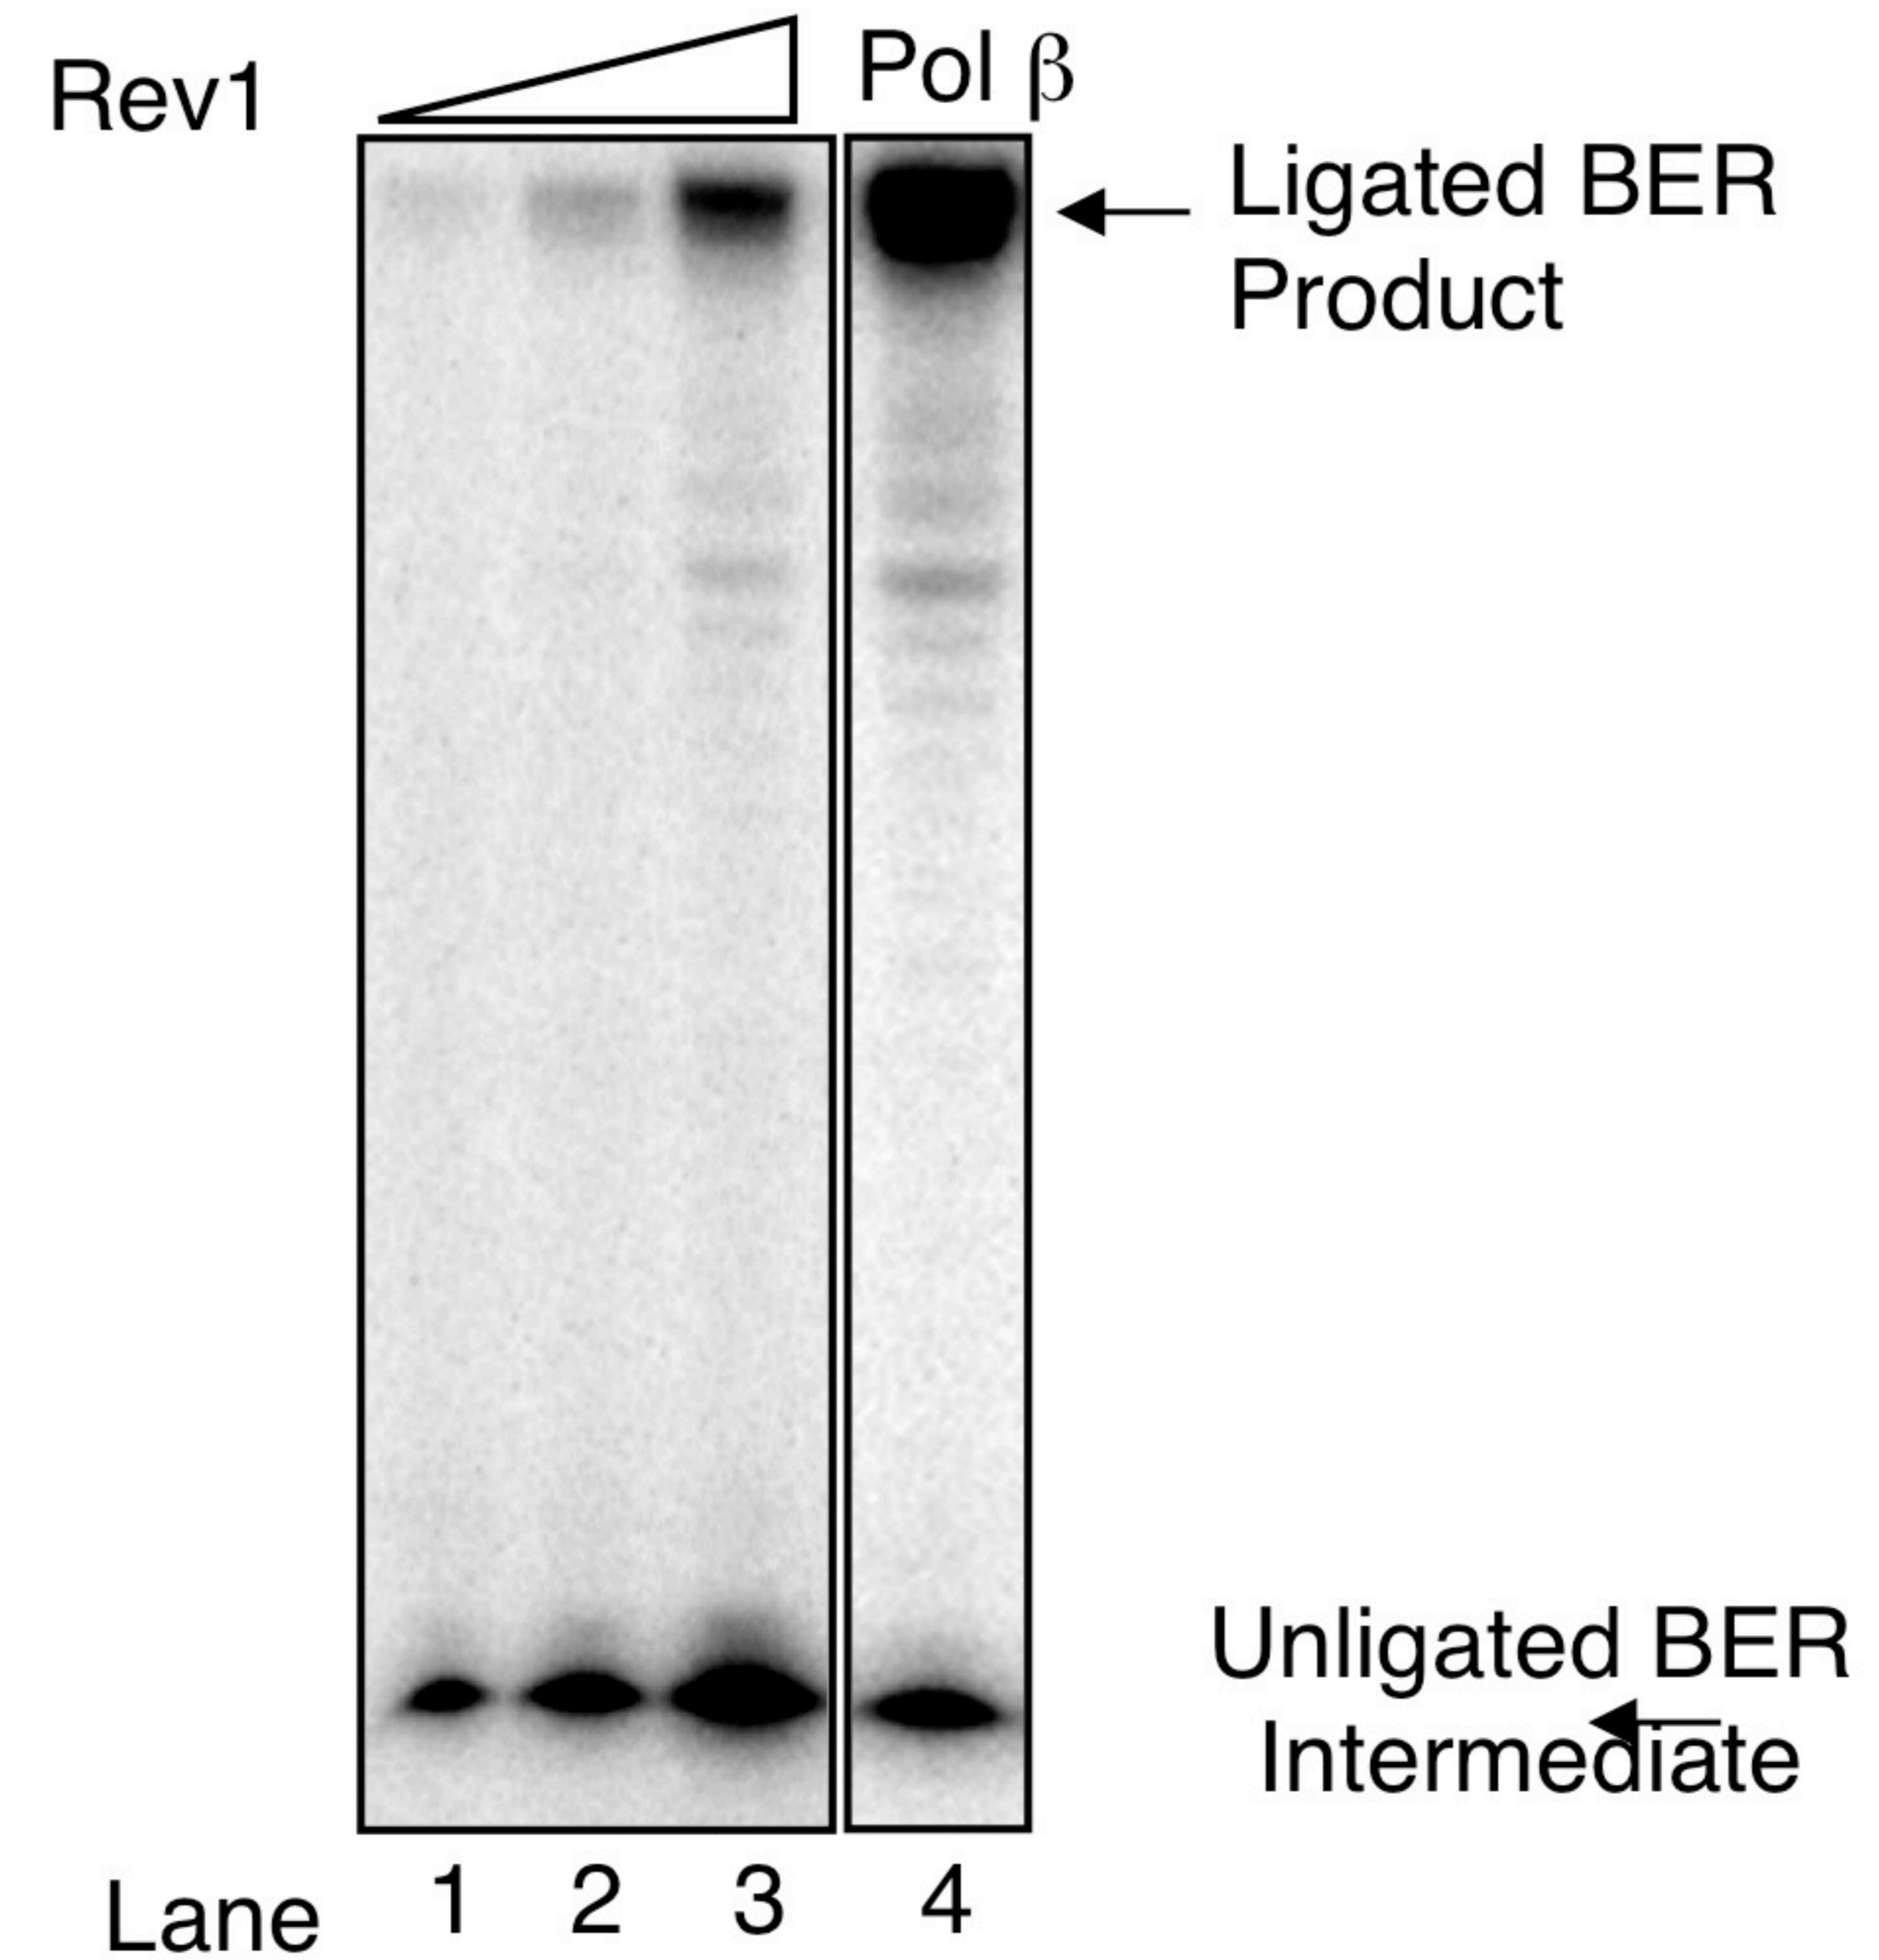

Figure S1

a) Domain Organization of Rev1

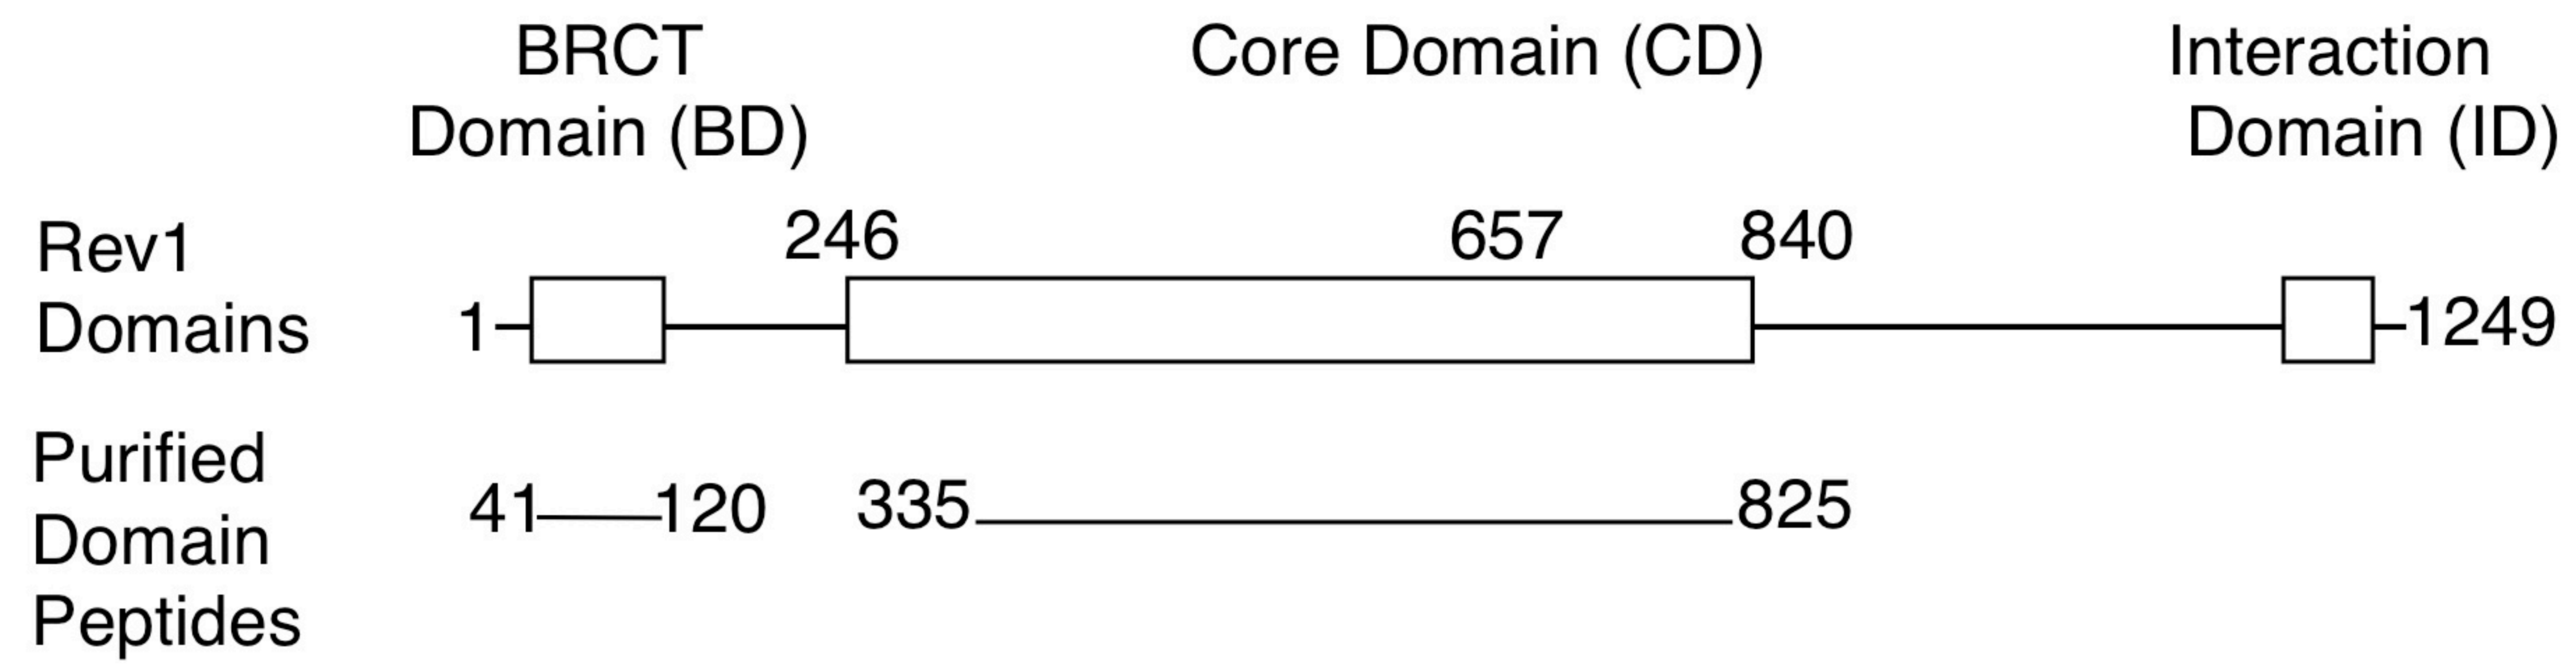

b) Purified MBP-CD and BD

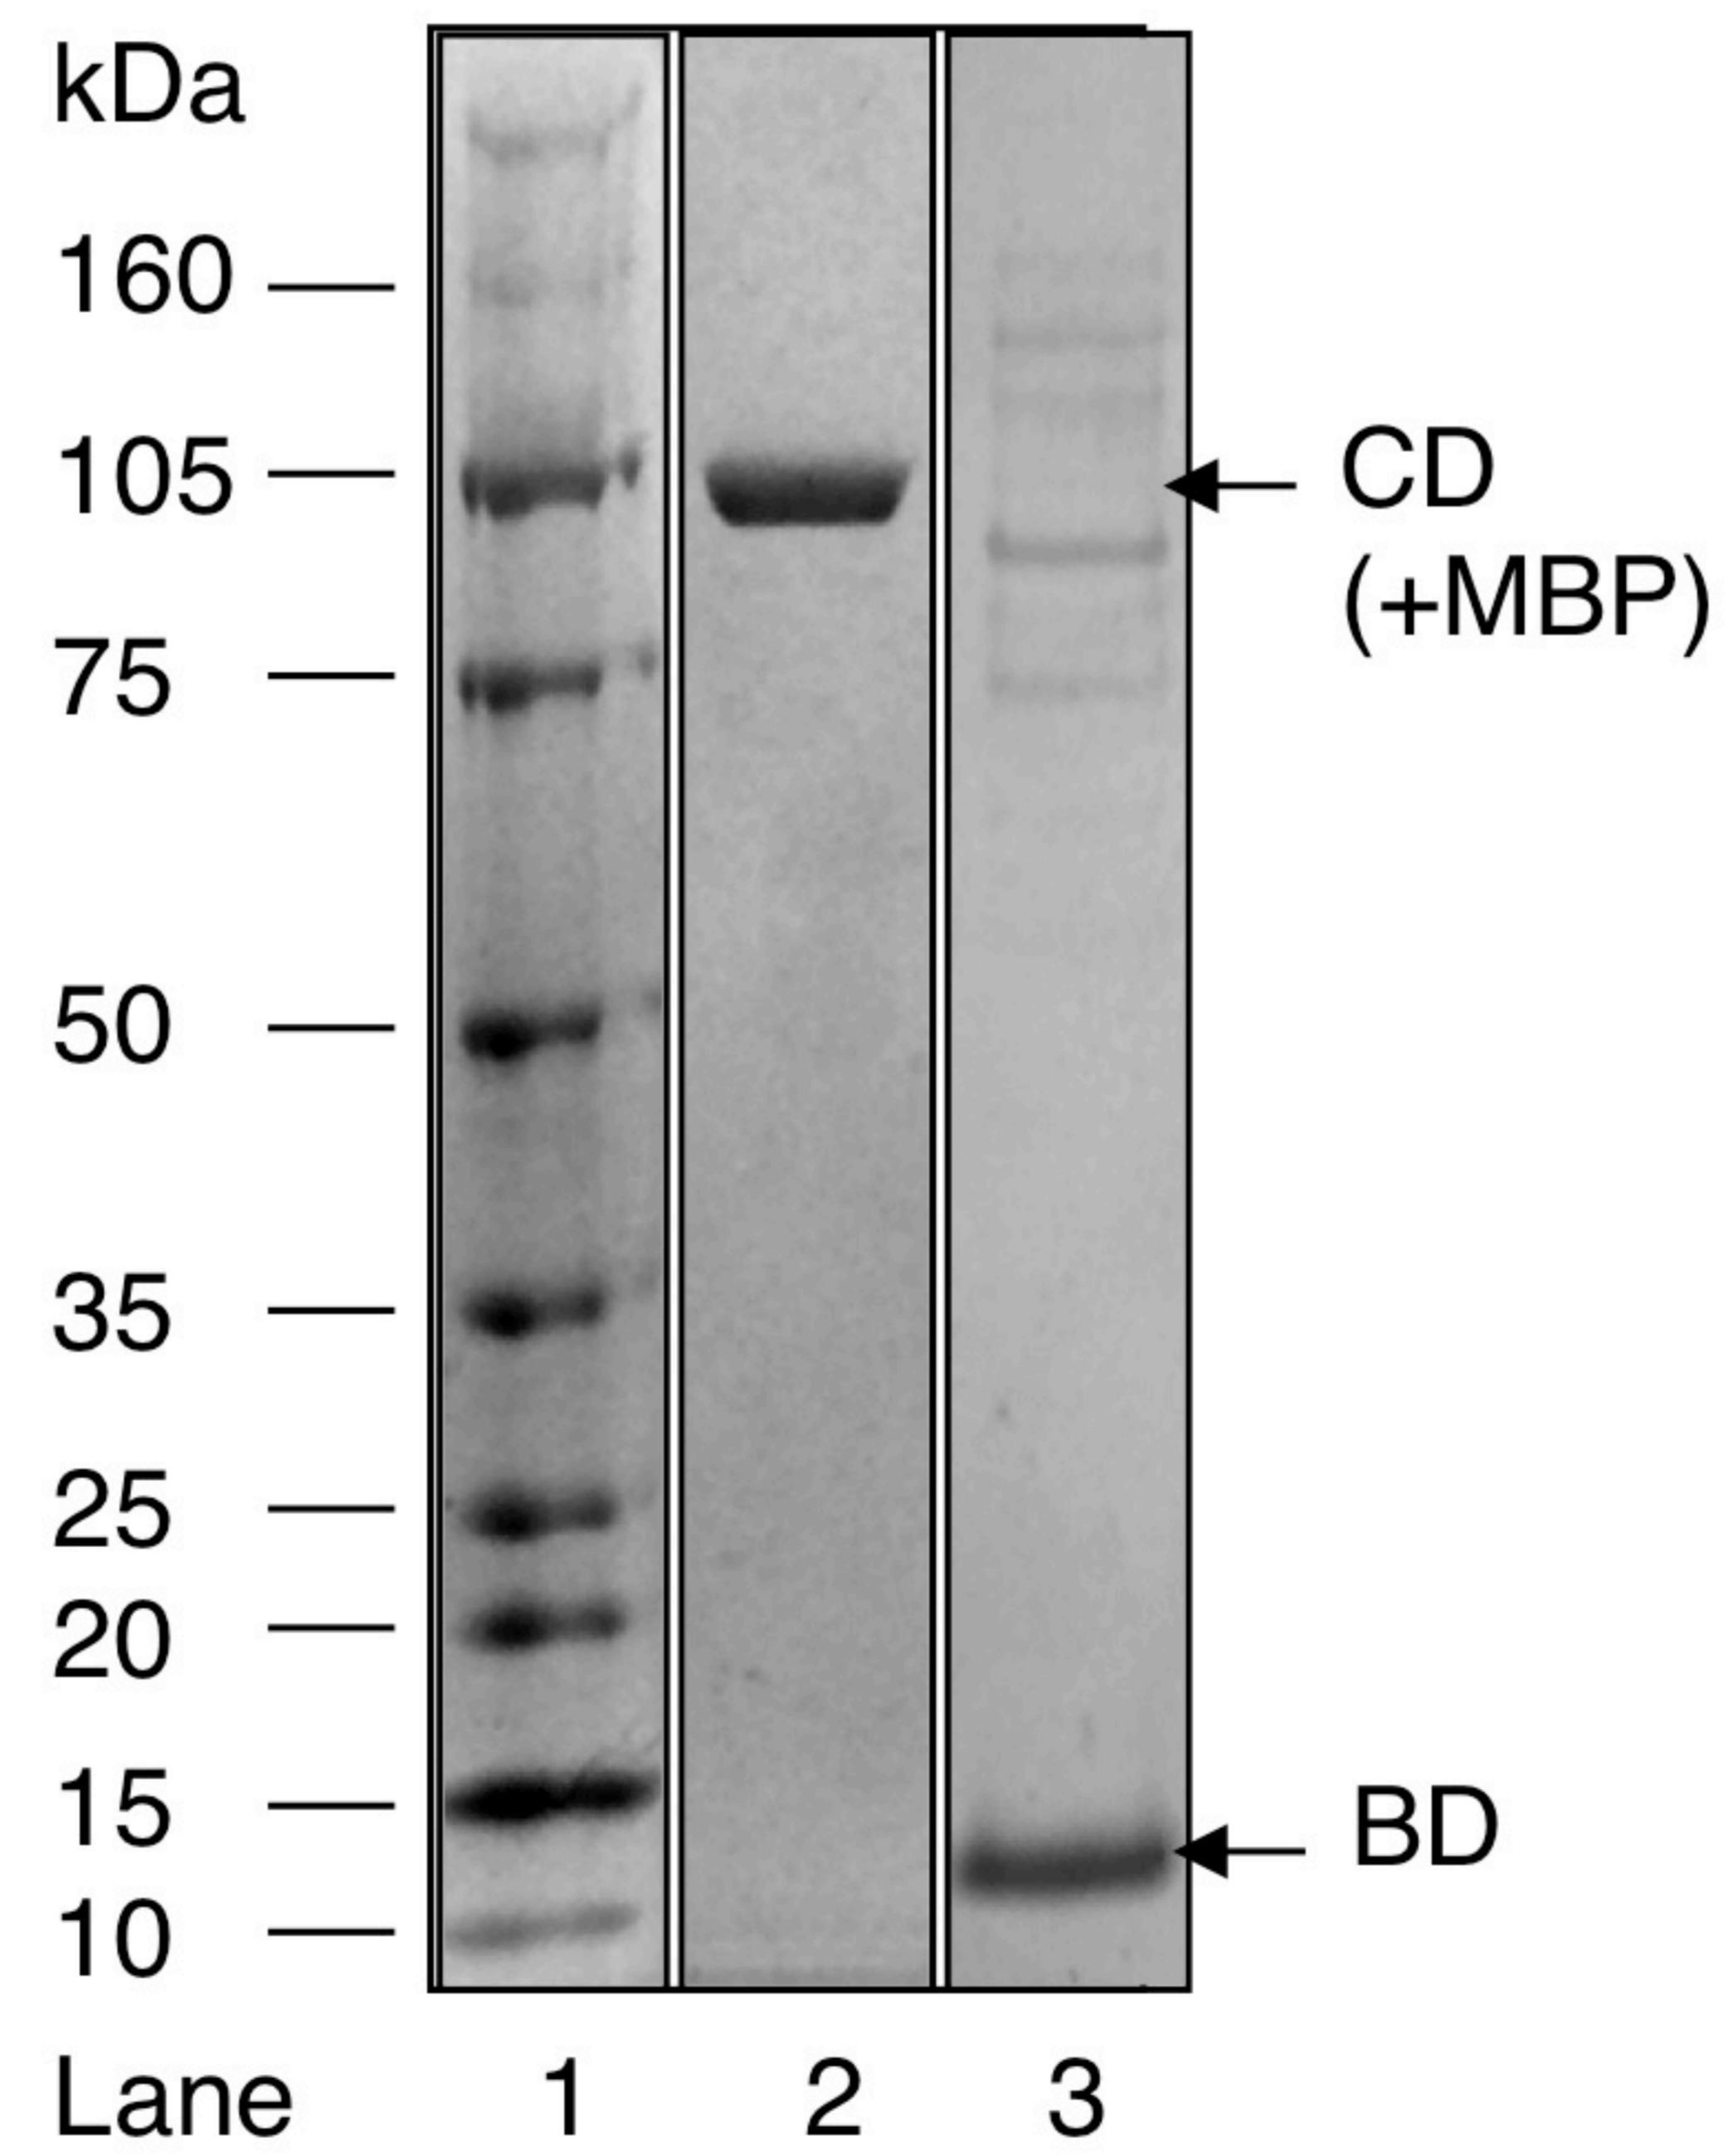

Figure S2
